# Supplementary material for: Digital droplet infusion
Source: Royal Society of Chemistry journal article supplement (doi:10.1039/d0lc00896f), 2020-11-13
Supplement: d0lc00896f1.pdf [file d0lc00896f1.pdf]

## Electronic Supplementary Information

### Digital Droplet Infusion

Zecong Fang <sup>a</sup>, Andrew I. Li <sup>b</sup>, Hong Liu <sup>c</sup> and Tingrui Pan <sup>\*a</sup>

<sup>a</sup> Micro-Nano Innovations (MiNI) Laboratory, Department of Biomedical Engineering, University of California, Davis, CA, 95616, USA.

<sup>b</sup> Department of Surgery, Division of Plastic Surgery, Hand, Upper Extremity and Microsurgery, University of California Davis Health, Sacramento, CA, 95817, USA

<sup>c</sup> Department of Anesthesiology and Pain Medicine, University of California Davis Health, Sacramento, CA, 95817, USA.

#### 1. Fast assembly of the DDI device

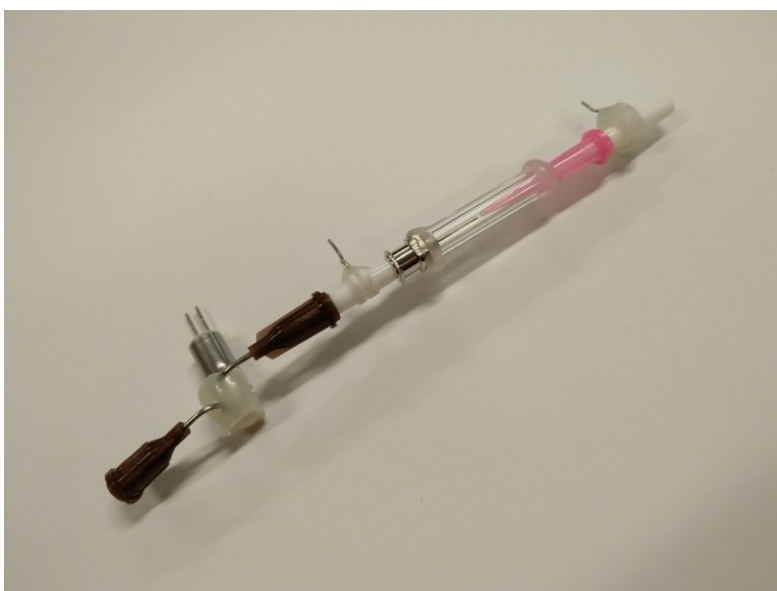

**Fig. S1** Fast assembly of a DDI device with completely off-the-shelf components.
